# Supplementary material for: Slow magnetic relaxation in dinuclear dysprosium and holmium phenoxide bridged complexes: a Dy2single molecule magnet with a high energy barrier
Source: Royal Society of Chemistry journal article supplement (doi:10.1039/d1qi00152c), 2021-01-01
Supplement: d1qi00152c1.pdf [file d1qi00152c1.pdf]

**Slow magnetic relaxation in dinuclear dysprosium and holmium phenoxide bridged complexes: a Dy<sub>2</sub> single molecule magnet with a high energy barrier.**

Matilde Fondo,<sup>\*a</sup> Julio Corredoira-Vázquez,<sup>a</sup> Ana M. García-Deibe,<sup>a</sup> Jesús Sanmartín-Matalobos,<sup>a</sup> Silvia Gómez-Coca,<sup>b</sup> Eliseo Ruiz<sup>b</sup>, Enrique Colacio<sup>c</sup>

<sup>a</sup> Departamento de Química Inorgánica, Facultad de Química, Universidade de Santiago de Compostela, Campus Vida, 15782 Santiago de Compostela, Spain.

<sup>b</sup> Departament de Química Inorgànica i Orgànica, and Institut de Química Teòrica i Computacional, Universitat de Barcelona, 08028 Barcelona, Spain

<sup>c</sup> Departamento de Química Inorgánica, Facultad de Ciencias, Universidad de Granada, Avda Fuentenueva s/n, 18071 Granada, Spain

**Figure S1.** Ellipsoid (50% probability) diagram for **Dy<sub>2</sub>** (from **Dy<sub>2</sub>·2THF**) page S3

**Figure S2.** Ellipsoid (50% probability) diagram for **Ho<sub>2</sub>**. page S3

**Figure S3.**  $\chi_M T$  vs  $T$  for **Ho<sub>2</sub>**. Inset:  $M/N\mu_B$  vs  $H$ . page S4

**Figure S4.** Frequency dependence of  $\chi'_M$  for **Dy<sub>2</sub>** in a zero dc field at different temperatures. page S4

**Figure S5.** Cole-Cole plot for **Dy<sub>2</sub>** at zero dc field. page S5

**Figure S6.** Arrhenius plot for **Dy<sub>2</sub>** in a zero dc field showing the Raman, Orbach and combination of Raman-Orbach fits. page S5

**Figure S7.** Temperature dependence of  $\chi''_M$  for **Dy<sub>2</sub>** in a zero dc field at different frequencies. page S5

**Figure S8.** Field-cooled (FC) and zero-field-cooled (ZFC) magnetization for **Dy<sub>2</sub>**, measured under a 1000 Oe dc field in warm mode (2 K/min). page S6

**Figure S9.** Frequency dependence of  $\chi''_M$  for **Ho<sub>2</sub>·4H<sub>2</sub>O** at 2.5 K under different magnetic fields. page S6

**Figure S10.** Employed geometry for the **Dy<sub>2</sub>** molecules including the Py molecule page S6

**Figure S11.** Isosurface of the CASSCF beta electron density of one of the Dy<sup>III</sup> ions of **Dy<sub>2</sub>** calculated as the difference between the total density and the spin density of the seven alpha active electrons. It is shown for the ground (above), first excited (middle) and second excited (below) states. page S7

**Table S1.** Main bond distances (Å) and angles (°) for **Dy<sub>2</sub>·2Py** and **Ho<sub>2</sub>·2Py** page S8

**Table S2.** SHAPE v2.1. Continuous shape measures calculation (c) 2013 Electronic Structure Group, Universitat de Barcelona page S9

**Table S3.** Generalised Debye model fitting parameters for **Dy<sub>2</sub>** page S10

**Table S4.** Calculated energies (in  $\text{cm}^{-1}$ ) of the states before the inclusion of the spin-orbit effect  
page S10

**Table S5.** Calculated energies (in  $\text{cm}^{-1}$ ) of the 8 lowest Kramers doublets after the RASSI step for  
the  $\text{Dy}_2$  compounds. page S11

**Table S6.** Calculated energies (in  $\text{cm}^{-1}$ ) of the 17 lowest states after the RASSI step for the  $\text{Ho}_2$   
compound. page S11

**Table S7.** Crystal data and structure refinement for  $[\text{Dy}(\text{H}_3\text{L}^{1,2,4})]_2 \cdot 2\text{THF}$  (**Dy<sub>2</sub>·2THF**),  
 $[\text{Dy}(\text{H}_3\text{L}^{1,2,4})]_2 \cdot 2\text{Py}$  (**Dy<sub>2</sub>·2Py**) and  $[\text{Ho}(\text{H}_3\text{L}^{1,2,4})]_2 \cdot 2\text{Py}$  (**Ho<sub>2</sub>·2Py**) page S12

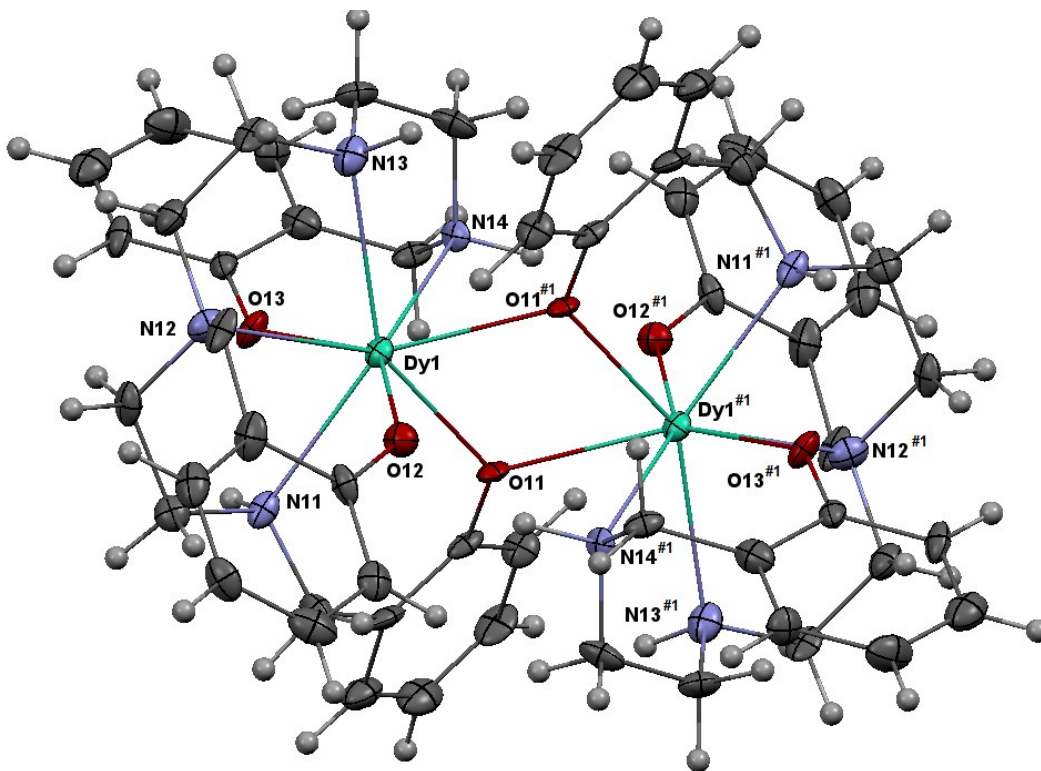

Figure S1. Ellipsoid (50% probability) diagram for  $Dy_2$  (from  $Dy_2 \cdot 2THF$ )

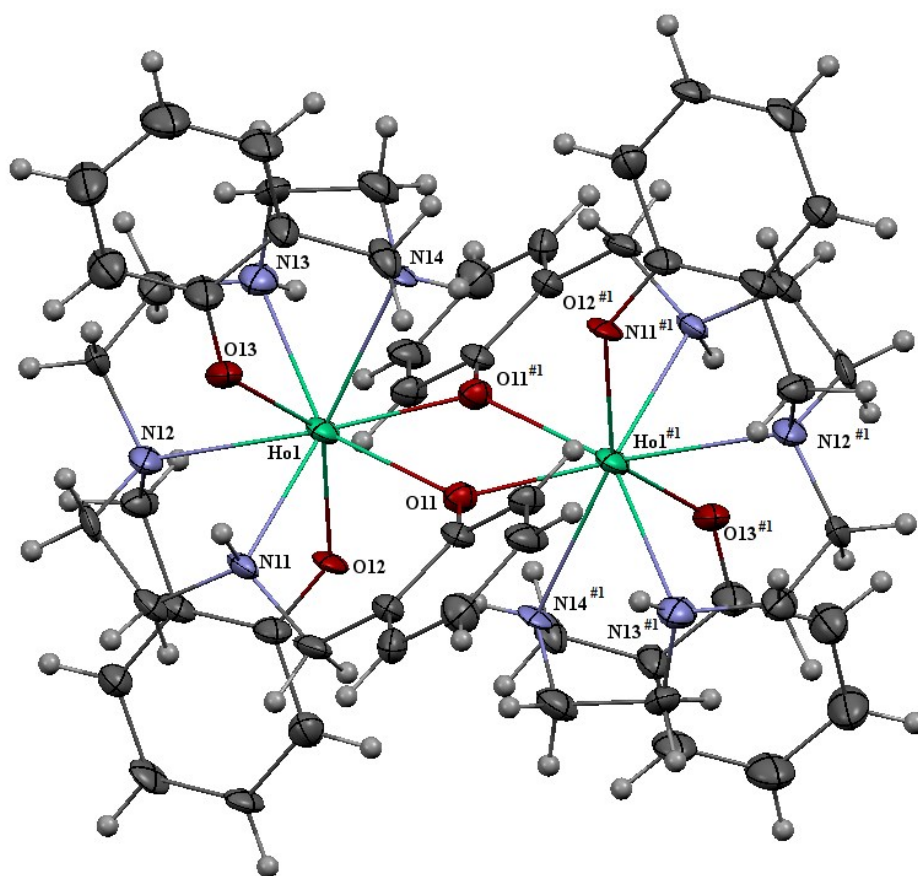

Figure S2. Ellipsoid (50% probability) diagram for  $Ho_2$ .

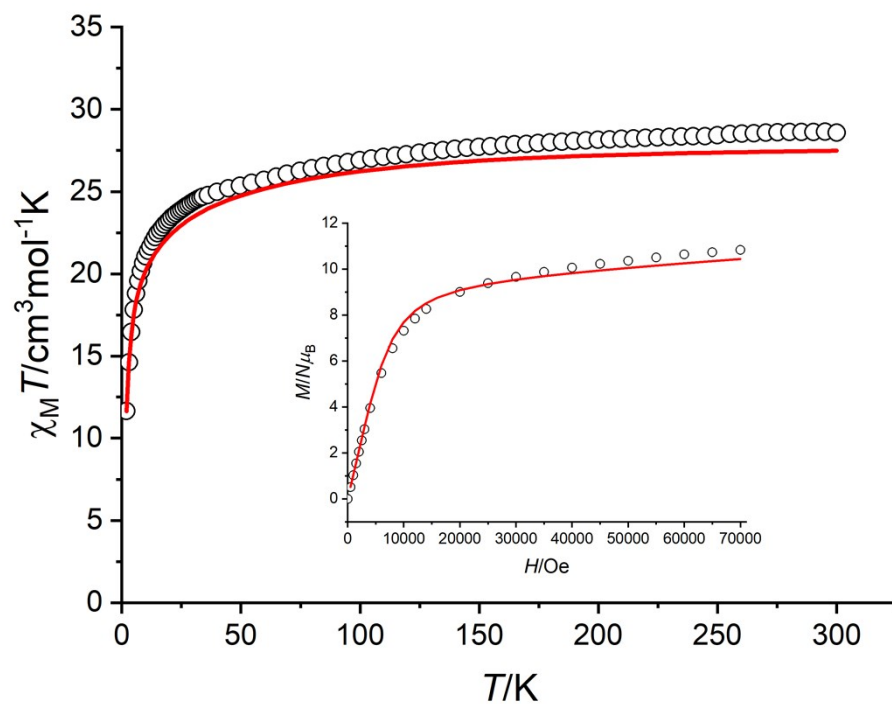

**Figure S3.**  $\chi_M T$  vs  $T$  for  $\text{Ho}_2$ . Inset:  $M/N\mu_B$  vs  $H$ . The solid red lines represent the theoretical data obtained from *ab initio* calculations including the dipolar interactions

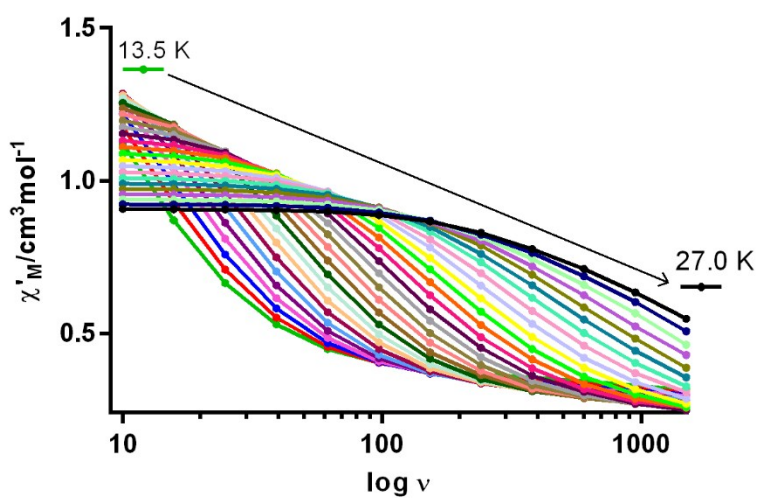

**Figure S4.** Frequency dependence of  $\chi'_M$  for  $\text{Dy}_2$  in a zero dc field at different temperatures.

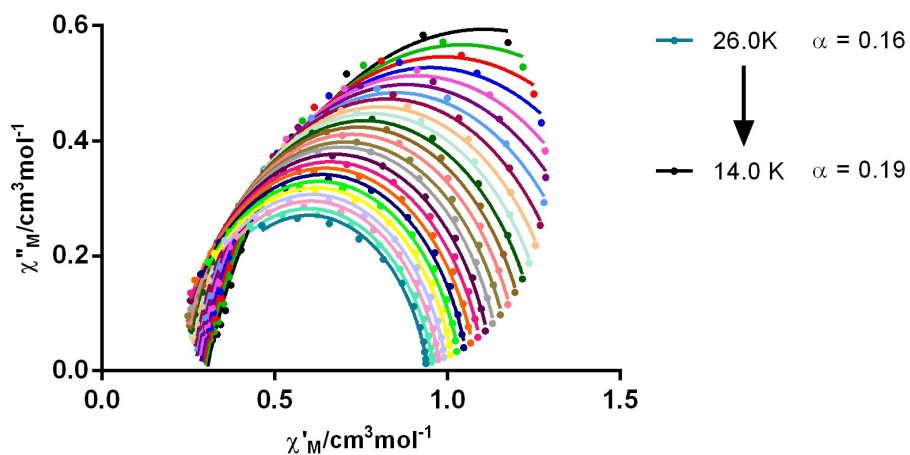

Figure S5. Cole-Cole plot for  $\text{Dy}_2$  at zero dc field.

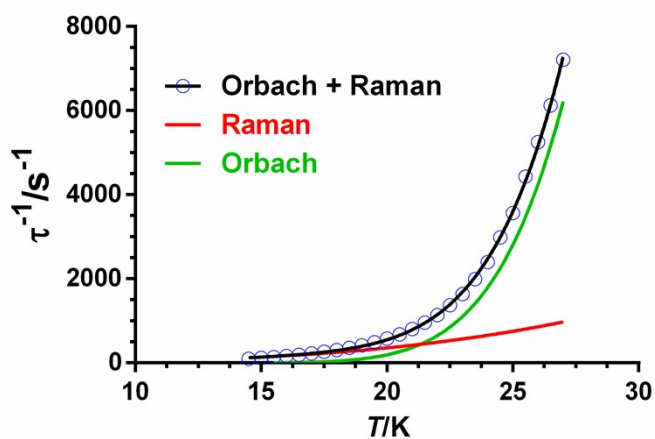

Figure S6. Arrhenius plot for  $\text{Dy}_2$  in a zero dc field showing the Raman, Orbach and combination of Raman-Orbach fits.

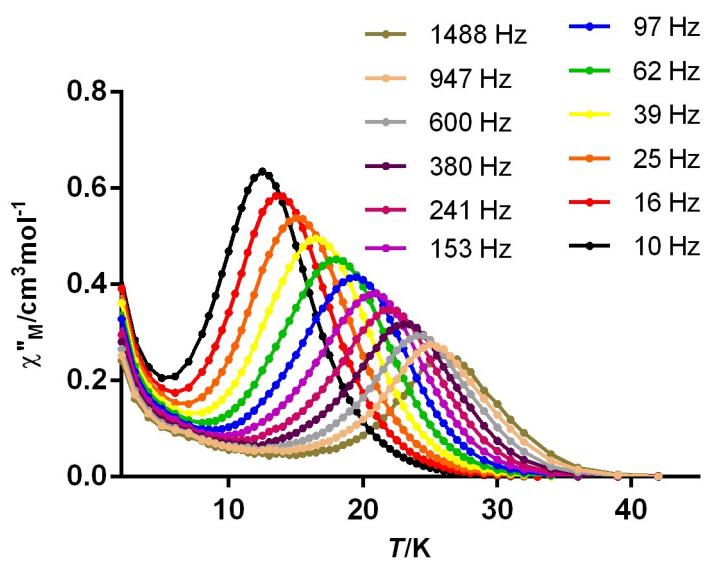

Figure S7. Temperature dependence of  $\chi''_M$  for  $\text{Dy}_2$  in a zero dc field at different frequencies.

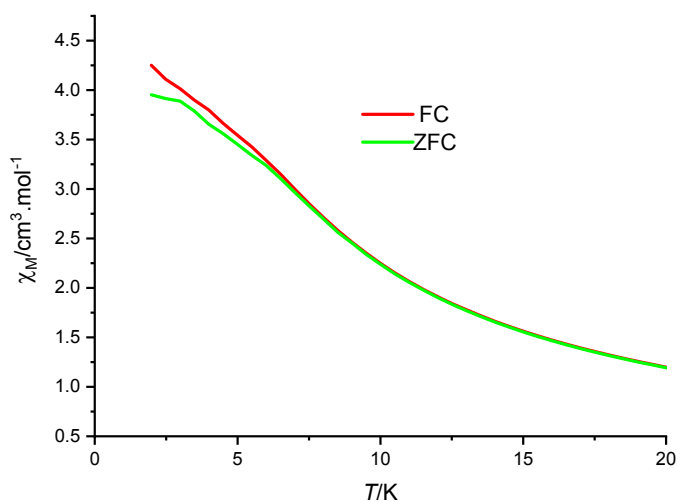

**Figure S8.** Field-cooled (FC) and zero-field-cooled (ZFC) magnetization for  $\text{Dy}_2$ , measured under a 1000 Oe dc field in warm mode (2 K/min).

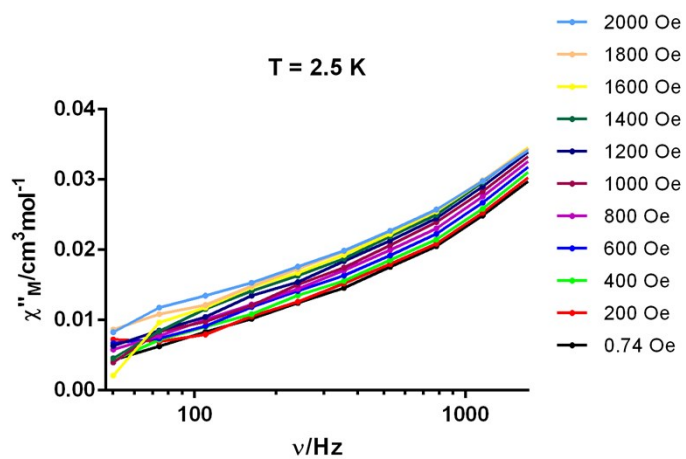

**Figure S9.** Frequency dependence of  $\chi''_M$  for  $\text{Ho}_2 \cdot 4\text{H}_2\text{O}$  at 2.5 K under different magnetic fields.

$\text{Dy}_2 \cdot \text{Py}1$

$\text{Dy}_2 \cdot \text{Py}2$

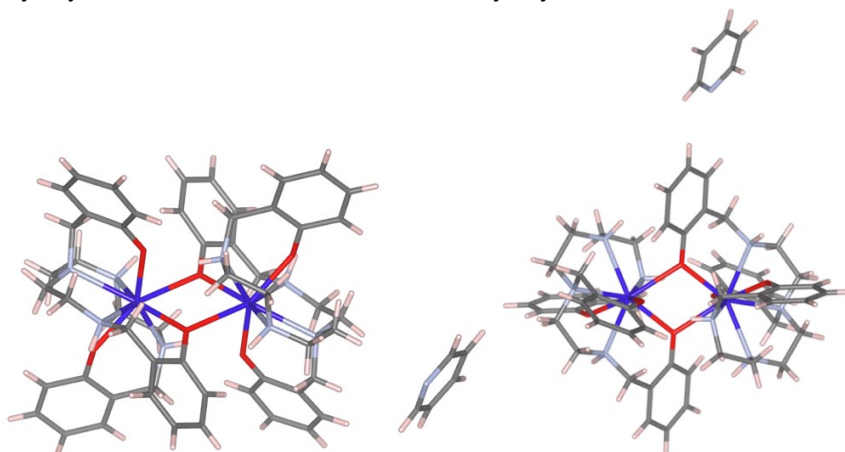

**Figure S10.** Employed geometry for the  $\text{Dy}_2$  molecules including the Py molecule.

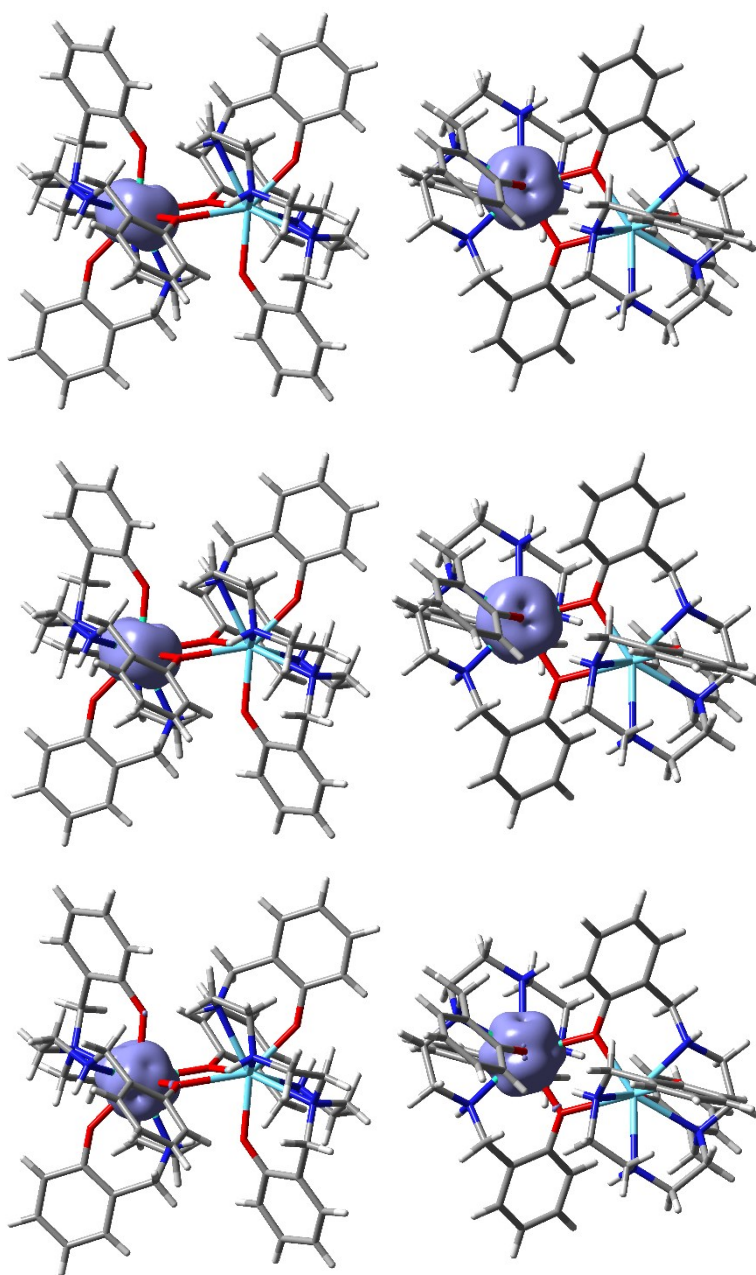

**Figure S11.** Isosurface of the CASSCF beta electron density of one of the Dy<sup>III</sup> ions of **Dy<sub>2</sub>** calculated as the difference between the total density and the spin density of the seven alpha active electrons. It is shown for the ground (above), first excited (middle) and second excited (below) states.

**Table S1.** Main bond distances (Å) and angles (°) for **Dy<sub>2</sub>·2THF**, **Dy<sub>2</sub>·2Py** and **Ho<sub>2</sub>·2Py**

|                         | <b>Dy<sub>2</sub>·2THF</b> | <b>Dy<sub>2</sub>·2Py</b> | <b>Ho<sub>2</sub>·2Py</b> |
|-------------------------|----------------------------|---------------------------|---------------------------|
| M1-O13                  | 2.261(7)                   | 2.261(10)                 | 2.241(8)                  |
| M1-O12                  | 2.264(7)                   | 2.254(9)                  | 2.271(7)                  |
| M1-O11                  | 2.319(7)                   | 2.340(8)                  | 2.318(7)                  |
| M1-O11 <sup>#1</sup>    | 2.481(7)                   | 2.512(10)                 | 2.487(7)                  |
| M1-N12                  | 2.590(10)                  | 2.591(10)                 | 2.561(9)                  |
| M1-N11                  | 2.503(9)                   | 2.522(10)                 | 2.511(8)                  |
| M1-N13                  | 2.586(9)                   | 2.579(10)                 | 2.567(9)                  |
| M1-N14                  | 2.560(8)                   | 2.529(9)                  | 2.520(8)                  |
| M1··M1#1                | 3.9219(12)                 | 3.945(7)                  | 3.9332(12)                |
| M1-O11-M1 <sup>#1</sup> | 109.5(3)                   | 108.7(3)                  | 109.9(3)                  |
| O12-M1-N14              | 149.2(3)                   | 149.6(3)                  | 149.5(3)                  |
| O13-M1-N11              | 66.5(3)                    | 66.3(3)                   | 66.2(3)                   |

<sup>#1</sup> -x+1,-y+1,-z



**Table S2.** SHAPE v2.1. Continuous shape measures calculation (c) 2013 Electronic Structure Group, Universitat de Barcelona.

**Geometries Coordination number 8**

|          |        |                                            |
|----------|--------|--------------------------------------------|
| ETBPY-8  | 13 D3h | Elongated trigonal bipyramid               |
| TT-8     | 12 Td  | Triakis tetrahedron                        |
| JSD-8    | 11 D2d | Snub diphenoïd J84                         |
| BTPR-8   | 10 C2v | Biaugmented trigonal prism                 |
| JBTPR-8  | 9 C2v  | Biaugmented trigonal prism J50             |
| JETBPY-8 | 8 D3h  | Johnson elongated triangular bipyramid J14 |
| JGBF-8   | 7 D2d  | Johnson gyrobifastigium J26                |
| TDD-8    | 6 D2d  | Triangular dodecahedron                    |
| SAPR-8   | 5 D4d  | Square antiprism                           |
| CU-8     | 4 Oh   | Cube                                       |
| HBPY-8   | 3 D6h  | Hexagonal bipyramid                        |
| HPY-8    | 2 C7v  | Heptagonal pyramid                         |
| OP-8     | 1 D8h  | Octagon                                    |

**[Dy(H<sub>3</sub>L<sup>1,2,4</sup>)<sub>2</sub>·2THF (Dy<sub>2</sub>·2THF)**

|                  |               |               |         |         |         |          |
|------------------|---------------|---------------|---------|---------|---------|----------|
| Structure [ML8 ] | ETBPY-8       | TT-8          | JSD-8   | BTPR-8  | JBTPR-8 | JETBPY-8 |
|                  | 22.932,       | 10.574,       | 2.469,  | 1.849,  | 2.092,  | 27.040   |
| JGBF-8           | <b>TDD-8</b>  | <b>SAPR-8</b> | CU-8    | HBPY-8  | HPY-8   | OP-8     |
| 11.890,          | <b>1.073,</b> | <b>1.711,</b> | 10.216, | 16.903, | 23.858, | 27.986   |

**[Dy(H<sub>3</sub>L<sup>1,2,4</sup>)<sub>2</sub>·2Py (Dy<sub>2</sub>·2Py)**

|                  |               |               |         |         |         |          |
|------------------|---------------|---------------|---------|---------|---------|----------|
| Structure [ML8 ] | ETBPY-8       | TT-8          | JSD-8   | BTPR-8  | JBTPR-8 | JETBPY-8 |
|                  | 23.149,       | 10.665,       | 2.554,  | 1.844,  | 2.126,  | 26.641   |
| JGBF-8           | <b>TDD-8</b>  | <b>SAPR-8</b> | CU-8    | HBPY-8  | HPY-8   | OP-8     |
| 12.006,          | <b>1.178,</b> | <b>1.520,</b> | 10.328, | 16.912, | 23.734, | 27.954   |

**[Ho(H<sub>3</sub>L<sup>1,2,4</sup>)<sub>2</sub>·2Py (Ho<sub>2</sub>·2Py)**

|                  |               |               |         |         |         |          |
|------------------|---------------|---------------|---------|---------|---------|----------|
| Structure [ML8 ] | ETBPY-8       | TT-8          | JSD-8   | BTPR-8  | JBTPR-8 | JETBPY-8 |
|                  | 22.979,       | 10.694,       | 2.655,  | 1.813,  | 2.072,  | 26.651,  |
| JGBF-8           | <b>TDD-8</b>  | <b>SAPR-8</b> | CU-8    | HBPY-8  | HPY-8   | OP-8     |
| 12.113,          | <b>1.230,</b> | <b>1.478,</b> | 10.316, | 16.970, | 23.459, | 27.656   |

**Table S3.** Generalised Debye model fitting parameters for  $\text{Dy}_2$ 

| $T/\text{K}$ | $\chi_S/(\text{cm}^3\text{mol}^{-1})$ | $\chi_T/(\text{cm}^3\text{mol}^{-1})$ | $\tau/(10^{-4}\text{s})$ | $\alpha$ |
|--------------|---------------------------------------|---------------------------------------|--------------------------|----------|
| 14.0         | 0.30                                  | 1.91                                  | 128.0                    | 0.19     |
| 14.5         | 0.30                                  | 1.79                                  | 104.7                    | 0.17     |
| 15.0         | 0.29                                  | 1.69                                  | 86.7                     | 0.16     |
| 15.5         | 0.28                                  | 1.62                                  | 72.9                     | 0.15     |
| 16.0         | 0.28                                  | 1.54                                  | 61.7                     | 0.13     |
| 16.5         | 0.27                                  | 1.49                                  | 52.4                     | 0.13     |
| 17.0         | 0.26                                  | 1.44                                  | 44.8                     | 0.12     |
| 17.5         | 0.26                                  | 1.39                                  | 38.1                     | 0.11     |
| 18.0         | 0.25                                  | 1.35                                  | 32.8                     | 0.11     |
| 18.5         | 0.25                                  | 1.31                                  | 28.0                     | 0.11     |
| 19.0         | 0.24                                  | 1.28                                  | 23.9                     | 0.11     |
| 19.5         | 0.24                                  | 1.24                                  | 20.4                     | 0.11     |
| 20.0         | 0.23                                  | 1.21                                  | 17.4                     | 0.11     |
| 20.5         | 0.22                                  | 1.19                                  | 14.7                     | 0.12     |
| 21.0         | 0.23                                  | 1.16                                  | 12.5                     | 0.11     |
| 21.5         | 0.22                                  | 1.13                                  | 10.5                     | 0.12     |
| 22.0         | 0.21                                  | 1.11                                  | 8.8                      | 0.13     |
| 22.5         | 0.21                                  | 1.09                                  | 7.3                      | 0.14     |
| 23.0         | 0.21                                  | 1.06                                  | 6.1                      | 0.14     |
| 23.5         | 0.21                                  | 1.04                                  | 5.0                      | 0.14     |
| 24           | 0.21                                  | 1.02                                  | 4.2                      | 0.15     |
| 24.5         | 0.22                                  | 1.00                                  | 3.3                      | 0.16     |
| 25.0         | 0.23                                  | 0.98                                  | 2.8                      | 0.15     |
| 25.5         | 0.23                                  | 0.96                                  | 2.3                      | 0.16     |
| 26.0         | 0.25                                  | 0.95                                  | 1.9                      | 0.16     |

**Table S4.** Calculated energies (in  $\text{cm}^{-1}$ ) of the states before the inclusion of the spin-orbit effect.

| State | $\text{Ho}_2$ | $\text{Dy}_2$ | $\text{Dy}_2\cdot\text{Py1}$ | $\text{Dy}_2\cdot\text{Py2}$ |
|-------|---------------|---------------|------------------------------|------------------------------|
| 1     | 0             | 0             | 0                            | 0                            |
| 2     | 47.6          | 5.1           | 4.6                          | 4.7                          |
| 3     | 102.0         | 308.1         | 305.3                        | 306.1                        |
| 4     | 159.8         | 365.9         | 352.1                        | 354.5                        |
| 5     | 209.9         | 416.5         | 412.2                        | 412.6                        |
| 6     | 251.8         | 460.3         | 452.1                        | 454.8                        |
| 7     | 267.2         | 520.7         | 510.9                        | 513.8                        |
| 8     | 327.6         | 569.4         | 577.3                        | 577.5                        |

**Table S5.** Calculated energies (in  $\text{cm}^{-1}$ ) of the 8 lowest Kramers doublets after the RASSI step for the  $\text{Dy}_2$  compounds.

| KDs | $\text{Dy}_2$ | $\text{Dy}_2\cdot\text{Py1}$ | $\text{Dy}_2\cdot\text{Py2}$ |
|-----|---------------|------------------------------|------------------------------|
| 1   | 0             | 0                            | 0                            |
| 2   | 231.6         | 230.9                        | 231.8                        |
| 3   | 341.9         | 334.6                        | 335.9                        |
| 4   | 405.7         | 395.3                        | 396.4                        |
| 5   | 470.1         | 459.7                        | 461.2                        |
| 6   | 517.2         | 507.7                        | 510.4                        |
| 7   | 578.4         | 577.6                        | 578.0                        |
| 8   | 750.6         | 751.7                        | 751.4                        |

**Table S6.** Calculated energies (in  $\text{cm}^{-1}$ ) of the 17 lowest states after the RASSI step for the  $\text{Ho}_2$  compound.

| State | $\text{Ho}_2$ |
|-------|---------------|
| 1     | 0             |
| 2     | 1.71          |
| 3     | 61.7          |
| 4     | 68.4          |
| 5     | 122.8         |
| 6     | 151.1         |
| 7     | 186.3         |
| 8     | 194.3         |
| 9     | 204.3         |
| 10    | 221.4         |
| 11    | 249.8         |
| 12    | 252.9         |
| 13    | 302.9         |
| 14    | 308.7         |
| 15    | 333.2         |
| 16    | 394.3         |
| 17    | 396.8         |

**Table S7.** Crystal data and structure refinement for [Dy(H<sub>3</sub>L<sup>1,2,4</sup>)<sub>2</sub>·2THF (**Dy<sub>2</sub>·2THF**), [Dy(H<sub>3</sub>L<sup>1,2,4</sup>)<sub>2</sub>·2Py (**Dy<sub>2</sub>·2Py**) and [Ho(H<sub>3</sub>L<sup>1,2,4</sup>)<sub>2</sub>·2Py (**Ho<sub>2</sub>·2Py**)

|                                    | <b>Dy<sub>2</sub>·2THF</b>                                                    | <b>Dy<sub>2</sub>·2Py</b>                                                      | <b>Ho<sub>2</sub>·2Py</b>                                                      |
|------------------------------------|-------------------------------------------------------------------------------|--------------------------------------------------------------------------------|--------------------------------------------------------------------------------|
| Empirical formula                  | C <sub>64</sub> H <sub>82</sub> Dy <sub>2</sub> N <sub>8</sub> O <sub>8</sub> | C <sub>64</sub> H <sub>76</sub> Dy <sub>2</sub> N <sub>10</sub> O <sub>6</sub> | C <sub>64</sub> H <sub>76</sub> Ho <sub>2</sub> N <sub>10</sub> O <sub>6</sub> |
| Molecular weight                   | 1392.35                                                                       | 1406.34                                                                        | 1411.20                                                                        |
| Crystal system                     | Monoclinic                                                                    | Triclinic                                                                      | Triclinic                                                                      |
| Space group                        | P2 <sub>1</sub> /n                                                            | P-1                                                                            | P-1                                                                            |
| Wavelength (Å)                     | 0.71073                                                                       | 0.71073                                                                        | 0.71073                                                                        |
| Crystal size (mm <sup>3</sup> )    | 0.070 x 0.060 x 0.020                                                         | 0.740 x 0.260 x 0.080                                                          | 0.070 x 0.050 x 0.020                                                          |
| Color, shape                       | Prism, colorless                                                              | Needle, colorless                                                              | Prism, colorless                                                               |
| T (K)                              | 100(2)                                                                        | 100(2)                                                                         | 100(2)                                                                         |
| a (Å)                              | 13.480(4)                                                                     | 9.902(18)                                                                      | 9.8904(11)                                                                     |
| b (Å)                              | 14.259(4)                                                                     | 12.75(3)                                                                       | 12.7769(15)                                                                    |
| c (Å)                              | 15.403(4)                                                                     | 13.67(3)                                                                       | 13.6362(17)                                                                    |
| α (°)                              | 90                                                                            | 64.03(5)                                                                       | 64.096(3)                                                                      |
| β (°)                              | 106.770(9)                                                                    | 76.98(4)                                                                       | 76.914(4)                                                                      |
| γ (°)                              | 90                                                                            | 67.75(4)                                                                       | 67.662(3)                                                                      |
| Volume (Å <sup>3</sup> )           | 2834.7(13)                                                                    | 1432(5)                                                                        | 1430.0(3)                                                                      |
| Z                                  | 2                                                                             | 2                                                                              | 1                                                                              |
| Absorpt. coef. (mm <sup>-1</sup> ) | 2.680                                                                         | 2.651                                                                          | 2.809                                                                          |
| Reflections collected              | 51827                                                                         | 18178                                                                          | 31962                                                                          |
| Independent reflections            | 5801 [R(int) = 0.1259]                                                        | 5235 [R(int) = 0.1695]                                                         | 5220 [R(int) = 0.1253]                                                         |
| Data / restraints / param.         | 5801 / 6 / 361                                                                | 5235 / 0 / 370                                                                 | 5220 / 12 / 370                                                                |
| Final R indices [I > 2σ(I)]        | R <sub>1</sub> = 0.0885<br>wR <sub>2</sub> = 0.2050                           | R <sub>1</sub> = 0.0711<br>wR <sub>2</sub> = 0.1486                            | R <sub>1</sub> = 0.0719<br>wR <sub>2</sub> = 0.1488                            |
| R indices (all data)               | R <sub>1</sub> = 0.1077<br>wR <sub>2</sub> = 0.2150                           | R <sub>1</sub> = 0.1307<br>wR <sub>2</sub> = 0.1749                            | R <sub>1</sub> = 0.1017<br>wR <sub>2</sub> = 0.1638                            |
